# Supplementary material for: TLR2, TLR4 and TLR10 Shape the Cytokine and Chemokine Release of H. pylori-Infected Human DCs
Source: PubMed Central journal article supplement (PMC7311968; doi:10.3390/ijms21113897), 2020-05-29
Supplement: ijms-21-03897-s001.pdf [file ijms-21-03897-s001.pdf]

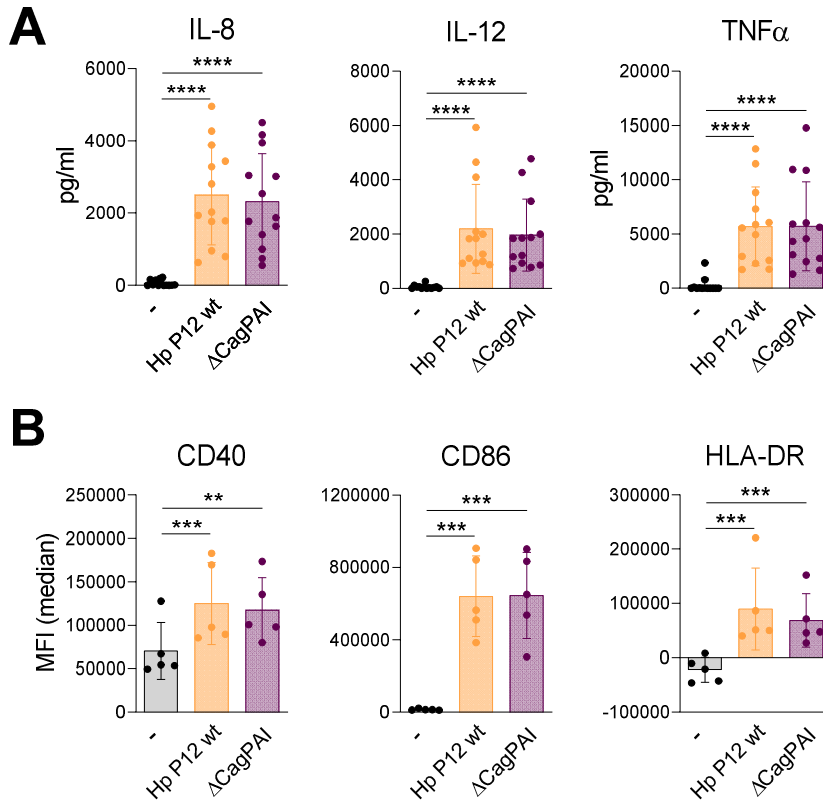

**Figure S1 No changes in the phenotype of moDCs infected with *H. pylori* wt or a mutant lacking the T4SS after 24 hours.** A/B moDCs were infected for 24 hours with *H. pylori* wt or a mutant lacking the type IV secretion system ( $\Delta$ CagPAI) at an MOI of 5. Cytokine secretion and surface marker expression were monitored by ELISA and flow cytometry, respectively. Dots represent individual donors, bars show mean $\pm$ SD. For statistical analysis, repeated measures, one-way ANOVA with Tukey's post-hoc test was performed.

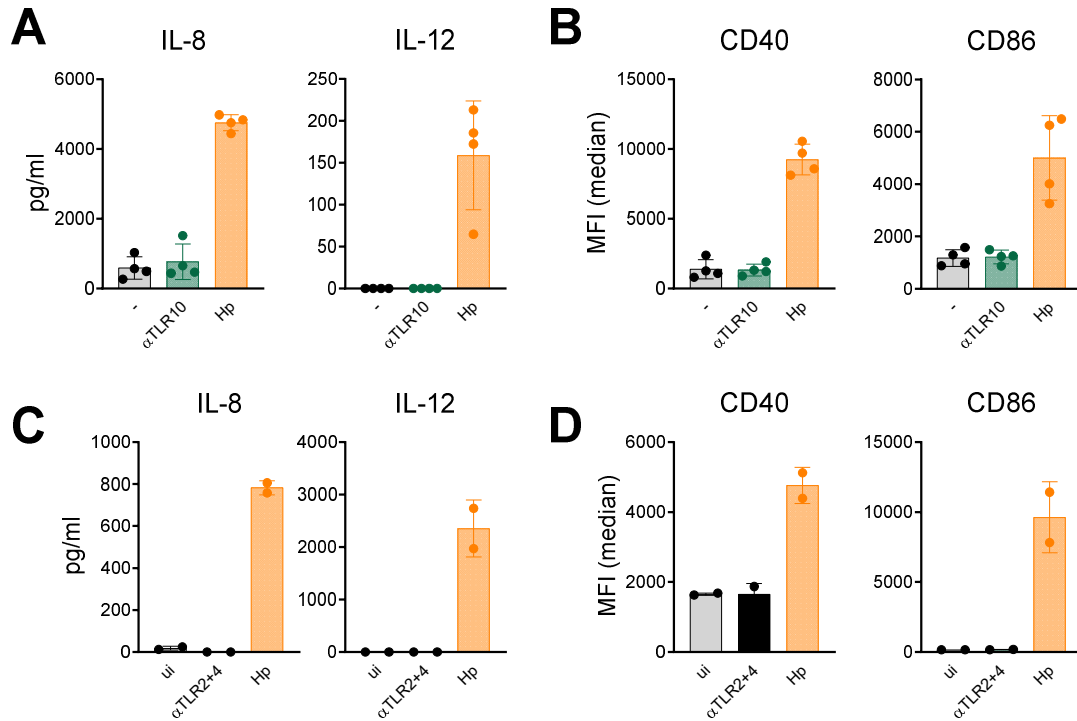

**Figure S2 In the absence of *H. pylori* infection, TLR blocking does not affect the cDC2 phenotype.** A/B cDC2s were treated with blocking antibody (10  $\mu$ g/mL) against TLR10 for 16 hours. Infection with *H. pylori* served as a positive control for DC activation. IL-8 and IL-12 secretion was measured by Multiplex-Technology (A) and CD40 and CD86 expression by flow cytometry (B). C/D moDCs were treated with blocking antibody (10  $\mu$ g/mL) against TLR2 and TLR4. Infection with *H. pylori* served as a positive control for DC activation. IL-8 and IL-12 secretion was measured by ELISA (C) and CD40 and CD86 expression by flow cytometry (D). Dots represent individual donors, bars show mean $\pm$ SD.

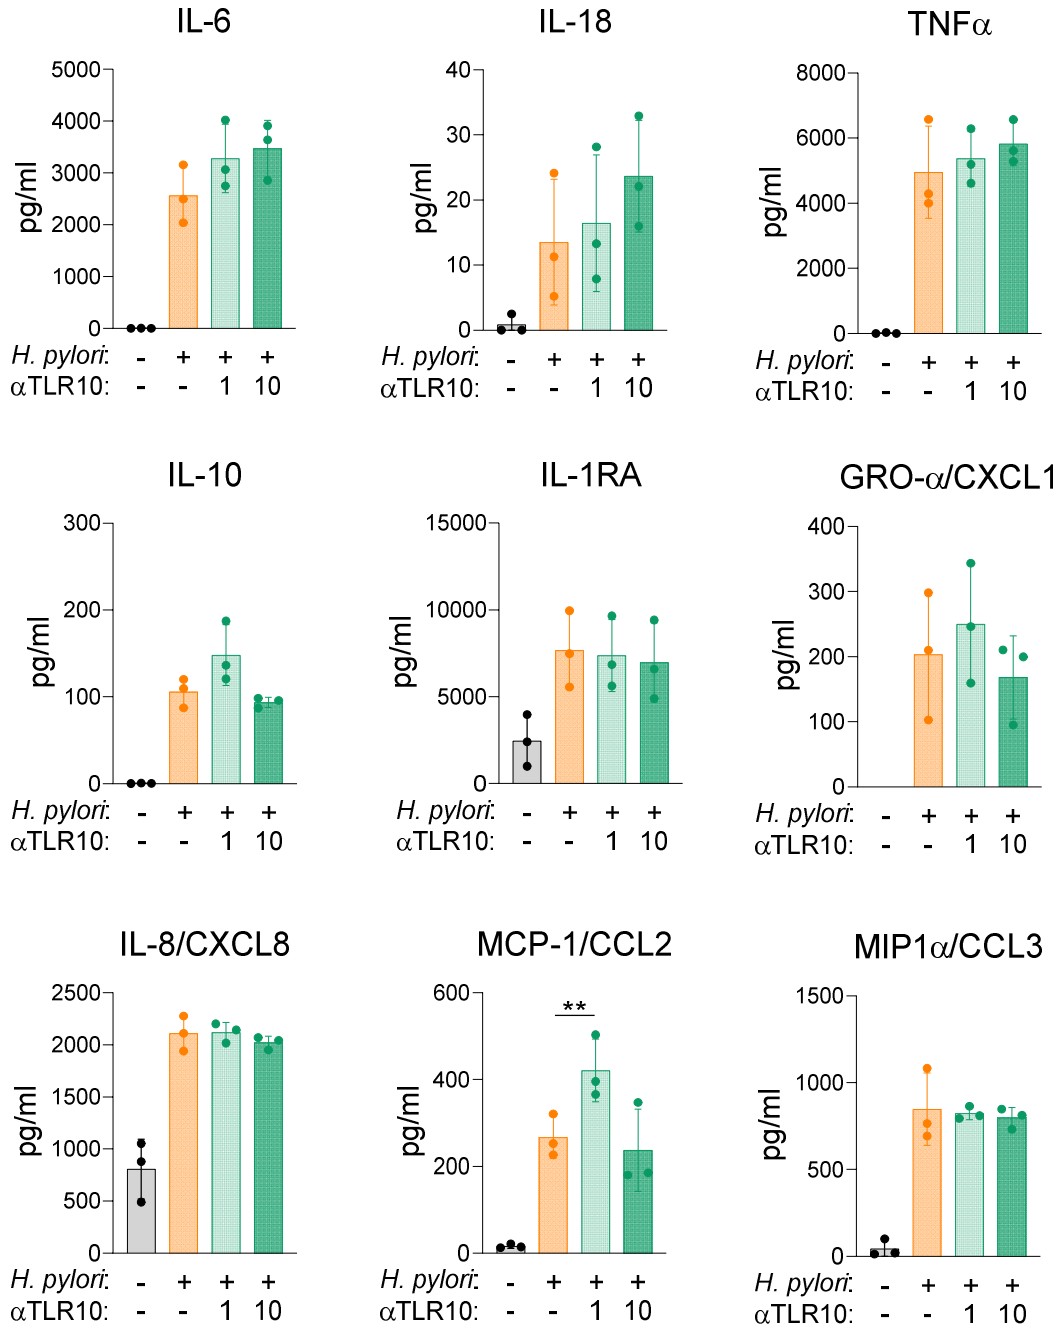

**Figure S3** Effects of TLR10 blocking on *H. pylori*-induced cytokine and chemokine secretion by cDC2s. cDC2s were infected with *H. pylori* P12 (MOI 5). 20 minutes prior to infection, cells were treated with a TLR10 blocking antibody at a concentration of 1  $\mu$ g/ml or 10  $\mu$ g/ml. Cytokine and chemokine secretion was monitored 16 hours post *H. pylori* infection by Multiplex-Assay. Dots represent individual donors, bars and lines show mean $\pm$ SD. For statistical analysis ANOVA with Dunnett's post-hoc test was performed. (\*\*  $p \leq 0.01$ )

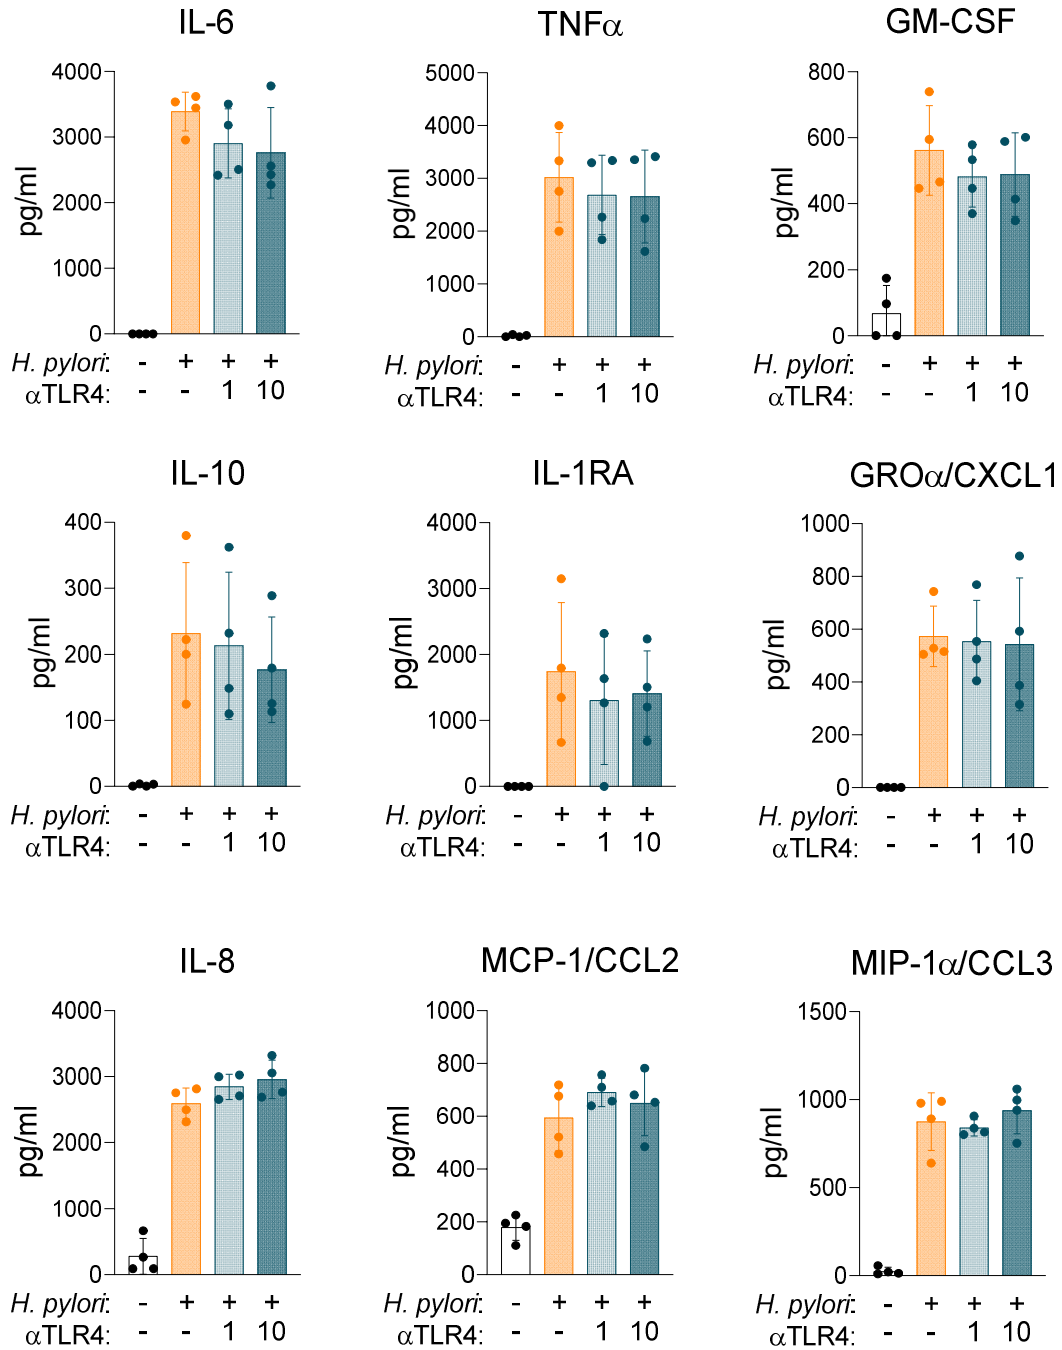

**Figure S4 Effects of TLR4 blocking on *H. pylori*-induced cytokine and chemokine secretion by cDC2s.** cDC2s were infected with *H. pylori* P12 (MOI 5). 20 minutes prior to infection, cells were treated with a TLR4 blocking antibody at a concentration of 1  $\mu$ g/ml or 10  $\mu$ g/ml. Cytokine and chemokine secretion was monitored 16 hours post *H. pylori* infection by Multiplex-Assay. Dots represent individual donors, bars and lines show mean $\pm$ SD.

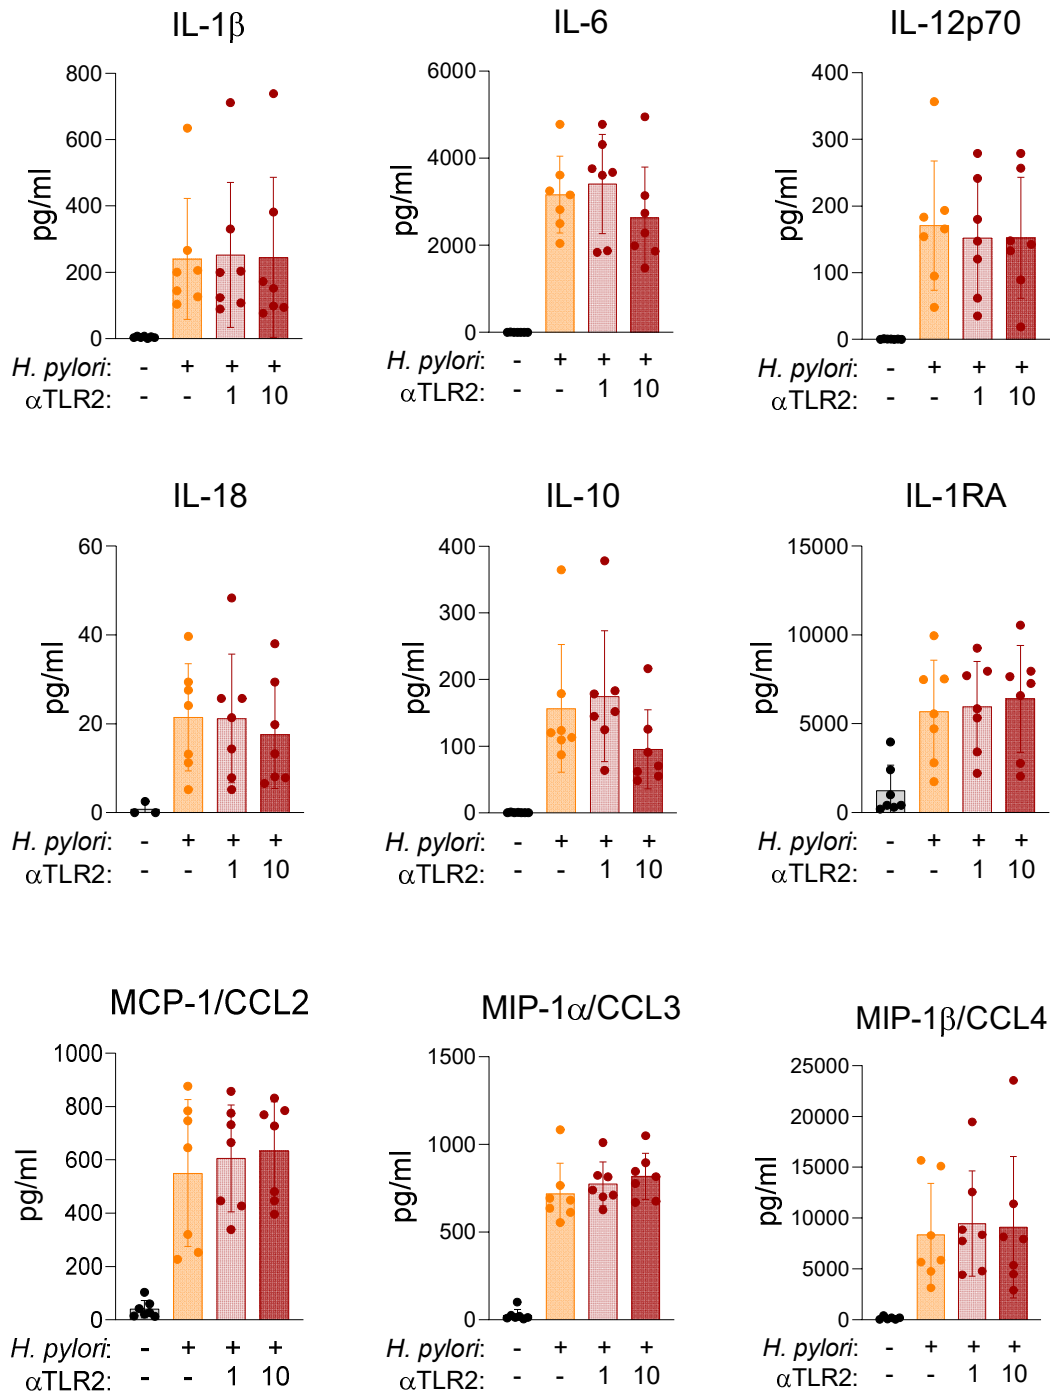

**Figure S5 Effects of TLR2 blocking on *H. pylori*-induced cytokine and chemokine secretion by cDC2s.** cDC2s were infected with *H. pylori* P12 (MOI 5). 20 minutes prior to infection, cells were treated with a TLR2 blocking antibody at a concentration of 1  $\mu$ g/ml or 10  $\mu$ g/ml. Cytokine and chemokine secretion was monitored 16 hours post *H. pylori* infection by Multiplex-Assay. Dots represent individual donors, bars and lines show mean $\pm$ SD.
